# Supplementary material for: 16GT: a fast and sensitive variant caller using a 16-genotype probabilistic model
Source: PubMed Central journal article supplement (PMC5570013; doi:10.1093/gigascience/gix045), 2017-06-15

# 16GT: a fast and sensitive variant caller using a 16-genotype probabilistic model

Ruibang Luo<sup>1,2,\*</sup>, Michael C. Schatz<sup>1,2</sup>, Steven L. Salzberg<sup>1,2,3</sup>

<sup>1</sup>Department of Computer Science, Johns Hopkins University

<sup>2</sup>Center for Computational Biology, McKusick-Nathans Institute of Genetic Medicine, Johns Hopkins University School of Medicine

<sup>3</sup>Departments of Biomedical Engineering and Biostatistics, Johns Hopkins University

Email addresses:

Ruibang Luo, [rluo5@jhu.edu](mailto:rluo5@jhu.edu)

Michael C. Schatz, [mschatz@jhu.edu](mailto:mschatz@jhu.edu)

Steven L. Salzberg, [salzberg@jhu.edu](mailto:salzberg@jhu.edu)

\*Corresponding Author

## 28 **Abstract**

29 16GT is a variant caller for Illumina whole-genome and whole-exome sequencing data. It uses  
30 a new 16-genotype probabilistic model to unify SNP and indel calling in a single variant calling  
31 algorithm. In benchmark comparisons with five other widely used variant callers on a modern  
32 36-core server, 16GT ran faster and demonstrated improved sensitivity in calling SNPs, and  
33 it provided comparable sensitivity and accuracy for calling indels as compared to the GATK  
34 HaplotypeCaller. 16GT is available at <https://github.com/aquaskyline/16GT>.

## 36 **Keywords**

37 Variant calling; Bayesian model; SNP calling; Indel calling

## 39 **Background**

40 Single nucleotide polymorphisms (SNPs) and insertions and deletions (indels) that occur at  
41 a specific genome position are interdependent; i.e., evidence that elevates the probability of  
42 one variant type should decrease the probability of other possible variant types, and the  
43 probability of all possible alleles should sum to 1. However, widely-used tools such as  
44 GATK's UnifiedGenotyper [1] and SAMtools [2] use separate models for SNP and indel  
45 detection. The model for SNP calling in these two tools is nearly identical: both assume all  
46 variants are biallelic (i.e., exactly two haplotypes are present) and use a probabilistic model  
47 allowing for 10 genotypes: AA, AC, AG, AT, CC, CG, CT, GG, GT, TT. For indel calling, the  
48 GATK UnifiedGenotyper uses a model from the Dindel's variant caller [3], while SAMtools'  
49 model is from BAQ [4].

## Findings

In order to detect SNPs and indels with a unified approach, we developed a new 16-genotype probabilistic model and its implementation named 16GT. Building on an idea first introduced in Luo et al. [5], 16GT uses an empirically improved model and is the first publicly available implementation. Using  $X$  and  $Y$  to denote the indels with the highest ( $X$ ) and second highest ( $Y$ ) support, we add 6 new genotypes ( $AX$ ,  $CX$ ,  $GX$ ,  $TX$ ,  $XX$  and  $XY$ ) to the traditional 10-genotype probabilistic model. The six new genotypes include: 1) one homozygous indel ( $XX$ ); 2) one reference allele plus one heterozygous indel ( $AX$ ,  $CX$ ,  $GX$ ,  $TX$ ); 3) one heterozygous SNP plus one heterozygous indel ( $AX$ ,  $CX$ ,  $GX$ ,  $TX$ , reusing the genotypes in 2); and 4) two heterozygous indels ( $XY$ ). We exclude the 5 possible combinations  $AY$ ,  $CY$ ,  $GY$ ,  $TY$ ,  $YY$  because  $X$  has higher support than  $Y$ . By unifying SNP and indel calling in a single variant calling algorithm, 16GT not only runs 4 times faster, but also demonstrates improved sensitivity in calling SNPs and comparable sensitivity in calling indels to the GATK HaplotypeCaller.

Posterior probabilities of these 16 genotypes are calculated using a Bayesian model  $P(L|F) \propto P(F|L)P(L)$ , where  $L$  is an assumed genotype.  $F$  refers to the observation of the 6 alleles ( $A$ ,  $C$ ,  $G$ ,  $T$ ,  $X$ ,  $Y$ ) at a given genome position.  $P(L)$  is the prior probability of the genotype,  $P(F|L)$  is the likelihood of the observed genotype. and  $P(L|F)$  is the posterior probability of the genotype. The resulting genotype  $L_{max}$  is assigned to the genotype with the highest posterior probability. The distance between the highest posterior probability and the second highest posterior probability is used as a quality metric in 16GT, along with some other metrics introduced by GATK [1].

### ***Calculating the probability of an observation $F$ given the genotype $L$***

To test how well an observation fits the expectation of different genotypes, we use a two-tailed Fisher's Exact Test  $P$  and use the resulting  $p$ -value as the goodness of fit. When

78 calculating the likelihood of a homozygous genotype, ideally we expect 100% single allele  
 79 support from the observation. For example, consider genotype 'AA':

$$80 \quad P(F|'AA') = P_{hom}(F_A) \times P_e(F_C, F_G, F_T, F_X, F_Y)$$

81 where  $P_e$  is the probability of an erroneous base call.

82 For a heterozygous genotype, 50% support is expected for each allele in the genotype, for  
 83 example consider 'CG':

$$84 \quad P(F|'CG') = P_{het}(F_C, F_G) \times P_e(F_A, F_T, F_X, F_Y)$$

85 where

$$86 \quad P_{hom}(F_A) = P \left( \begin{array}{c} F_A \\ (1 - P_{err})F \end{array} \quad \begin{array}{c} F \\ F \end{array} \right)$$

$$87 \quad P_{het}(F_C, F_G) = \sqrt{\prod_{i=C,G} P \left( \begin{array}{c} F_i \\ (0.5 - P_{err})F \end{array} \quad \begin{array}{c} F \\ F \end{array} \right)}$$

$$88 \quad P_e(F_A, F_T, F_X, F_Y) = P \left( \begin{array}{c} F_A + F_T + F_X + F_Y \\ P_{err} \times F \end{array} \quad \begin{array}{c} F \\ F \end{array} \right)$$

$$89 \quad F_s = \sum_{i=1}^n f(Q_i, M_i, s) \quad s \in \{A, C, G, T, X, Y\}$$

90 where  $s$  is the allele type,  $n$  is the number of reads supporting allele  $s$ ,  $Q_i$  is the base quality,  
 91 and  $M_i$  is the mapping quality.  $f$  is a function describing how  $s$ ,  $Q_i$  and  $M_i$  change the  
 92 observation:

$$93 \quad f(Q_i, M_i, s) = \alpha \times \beta \times \gamma \left\{ \begin{array}{l} \alpha = 0 \text{ if } M_i = 0 \\ \alpha = 1 \text{ if } M_i \neq 0 \\ \beta = 0 \text{ if } Q_i < 10 \\ \beta = 1 \text{ if } 10 \leq Q_i < 13 \\ \beta = 2 \text{ if } 13 \leq Q_i < 17 \\ \beta = 3 \text{ if } 17 \leq Q_i < 20 \\ \beta = 4 \text{ if } Q_i \geq 20 \\ \gamma = 1 \text{ if } s \in \{A, C, G, T\} \\ \gamma = 1.375 \text{ if } s \in \{X, Y\} \end{array} \right.$$

94  
 95 The possible reasons for an observation that does not match the reference genome are: 1) a  
 96 true variant; 2) an error generated in library construction; 3) a base calling error; 4) a  
 97 mapping error; and 5) an error in the reference genome. Reasons 3 and 4 are explicitly

98 captured in our model. For reasons 2 and 5, we include two error probabilities,  $P_s$  for SNP  
99 error and  $P_d$  for indel error. We define  $P_{err}=P_s+P_d$ , where  $P_s$  and  $P_d$  are set to 0.01 and 0.005,  
100 respectively. These two values were set empirically based on the observation that SNP  
101 errors are more common than indel errors in library construction and in the reference  
102 genome.

103  
104 In addition, most short read aligners use a dynamic programming algorithm to enable  
105 gapped alignment, using a scoring scheme that usually penalizes gap opening and  
106 extension more than mismatch. Consequently, authentic gaps that occur at an end of a read  
107 are more likely to be substituted by a set of false SNPs or alternatively to get trimmed or  
108 clipped. Thus, we applied a coefficient  $\gamma$  to weight indel observations more than SNPs, in  
109 order to increase the sensitivity on indels.

### 110 111 ***Calculating the probability of the genotype L***

112 Given 1) a known rate of single nucleotide differences between two unrelated haplotypes; 2)  
113 a known rate of single indel differences between two unrelated haplotypes; and 3) a known  
114 Transitions to Transversions ratio (Ti/Tv), the 16GT model's prior probabilities are calculated  
115 as shown in **Table 1**.

116  
117  
118  
119  
120  
121  
122  
123  
124

**Table 1.  $P(L)$ , Genotype prior probabilities for a reference allele 'A'.**

Hom.: homozygous. Het.: heterozygous.

| $L$    | Zygoty | Number of SNPs | Number of Indels | Number of Transversions | Prior Probability $P(L)$     |
|--------|--------|----------------|------------------|-------------------------|------------------------------|
| AA     | Hom.   | -              | -                | 0                       | 1                            |
| GG     | Hom.   | 1              | 0                | 2                       | $\theta/2*\epsilon*\epsilon$ |
| CC, TT | Hom.   | 1              | 0                | 0                       | $\theta/2$                   |
| AG     | Het.   | 1              | 0                | 1                       | $\theta*\epsilon$            |
| AC, AT | Het.   | 1              | 0                | 0                       | $\theta$                     |
| CG, GT | Het.   | 2              | 0                | 1                       | $\theta*\theta/2*\epsilon$   |
| CT     | Het.   | 2              | 0                | 0                       | $\theta*\theta/2$            |
| AX     | Het.   | 0              | 1                | 0                       | $\omega$                     |
| GX     | Het.   | 1              | 1                | 1                       | $\omega*\theta/2*\epsilon$   |
| CX, TX | Het.   | 1              | 1                | 0                       | $\omega*\theta/2$            |
| XX     | Hom.   | 0              | 1                | 0                       | $\omega/2$                   |
| XY     | Het.   | 0              | 2                | 0                       | $\omega*\omega/2$            |

Given 1) a known rate  $\theta$  of single nucleotide differences between two unrelated haplotypes; 2) a known rate  $\omega$  of single indel differences between two unrelated haplotypes; and 3) a known Transitions to Transversions ratio (Ti/Tv)  $\epsilon$ , where transition is expected to occur more frequently than transversion under selective pressure. The default known rates for human genome are:  $\theta = 0.001$ ,  $\omega = 0.0001$ ,  $\epsilon = 2.1$ , where  $\epsilon$  is set to the value for human and change between species.

## Results

We benchmarked 16GT with GATK UnifiedGenotyper, GATK HaplotypeCaller [1], Freebayes [6], Fermikit [7] and ISAAC [8] using a set of very high-confidence variants developed by the Genome-in-a-bottle (GIAB) project for genome NA12878 [9] (version 2.19, Additional File 1: **Supplementary Note**). The results are shown in **Table 2**.

**Table 2. Benchmark comparisons between 16GT and five other variant callers on a dataset from the Genome in a Bottle project consisting of 787M read pairs (53-fold) from genome NA12878. UG: GATK UnifiedGenotyper; HC: GATK HaplotypeCaller. FP: false positive, FN: false negative.**

| Caller    | Time (minutes w/ 36 cores) | SNP       |       |           |             |                |        | Indel   |       |           |             |        |
|-----------|----------------------------|-----------|-------|-----------|-------------|----------------|--------|---------|-------|-----------|-------------|--------|
|           |                            | TP        | FP    |           |             |                | FN     | TP      | FP    |           |             | FN     |
|           |                            |           | Total | dbSNP 138 | dbSNP 138 % | TP in Omni 2.5 |        |         | Total | dbSNP 138 | dbSNP 138 % |        |
| 16GT      | 121                        | 2,663,179 | 5,346 | 4,220     | 79%         | 20/20          | 918    | 167,549 | 1,462 | 944       | 65%         | 3,180  |
| UG        | 29                         | 2,655,608 | 1,639 | 563       | 34%         | 15/15          | 8,489  | 163,839 | 624   | 546       | 88%         | 6,890  |
| HC        | 539                        | 2,653,684 | 419   | 143       | 34%         | 4/4            | 10,413 | 168,444 | 1,232 | 726       | 59%         | 2,285  |
| Freebayes | 52                         | 2,655,513 | 724   | 353       | 49%         | 11/14          | 8,584  | 162,505 | 559   | 0         | 0%          | 8,224  |
| Fermikit  | 45                         | 2,567,672 | 2,036 | 509       | 25%         | 9/9            | 96,425 | 161,916 | 1,996 | 1,076     | 54%         | 8,813  |
| ISAAC     | 63                         | 2,659,438 | 1,115 | 586       | 53%         | 15/15          | 4,659  | 158,642 | 1,239 | 710       | 57%         | 12,087 |

140  
141 For SNPs, 16GT produced the most true positive calls and the fewest false negative calls;  
142 i.e. it has the highest sensitivity among all tools. 79% of 16GT's false positive calls were also  
143 reported by dbSNP version 138, which is highest among other callers. However, we should  
144 point out that the GIAB variant set is biased towards GATK because it was primarily derived  
145 from GATK-based analyses, as reported previously [10]. As a less-biased test, we therefore  
146 assessed the false positive calls against a set of unbiased calls made by the Illumina Omni  
147 2.5 SNP array (Additional File 1: **Supplementary Note**). Among the 5,346 false positive  
148 calls for 16GT, 20 were covered by the Omni array and all 20 (100%) had the correct  
149 genotype. Although limited by the small number of measurable alleles in the Illumina Omni  
150 2.5 SNP array, only allowing us to reassess 20 'false positive' calls as true positives, the  
151 observation that all 20 genotypes out of the 20 covered alleles are correct suggests that a  
152 number of the remaining "false positive" calls are actually correct.

153  
154 For indels, 16GT produced fewer true positive calls and more false negative calls than  
155 HaplotypeCaller, but less than half as many false negative calls as UnifiedGenotyper. 65%  
156 of 16GT's false positive indels were covered by dbSNP version 138. Further investigation  
157 into the 1,462 false positive indels shows that 981 (67%) of them meet all three of the  
158 following criteria: 1) at least three reads supporting the variant; 2) at least one read

159 supporting both the positive and negative strands, and; 3) in over 80% of the reads that  
160 support the variant, there exists no other variant in its flanking 10bp. This suggests that  
161 some of these “false positives” might be correct, although further experimental validation  
162 would be required to confirm this suggestion. Figure 1 shows three examples where the  
163 putative false positive from 16GT is likely to be correct.

164

## 165 **Conclusions**

166 16GT is the firstly publicly available implementation using a 16-genotype probabilistic model  
167 for variant calling. Compared with local assembly based variant callers, 16GT provides  
168 better sensitivity in SNP calling and comparable sensitivity in indel calling. In the future, we  
169 will improve 16GT to support somatic variant detection and extend the model to support  
170 variant calling in species with more than two haplotypes.

171

## 172 **Declarations**

### 173 ***Acknowledgements***

174 We thank United Electronics Co. Limited for providing code samples for the bam2snapshot  
175 function.

176

### 177 ***Funding***

178 This work has been supported by the U.S. National Institutes of Health under grants R01-  
179 HL129239 and R01-HG006677.

180

### 181 ***Availability of data and materials***

182 Project name: 16GT

183 Project homepage: <https://github.com/aquaskyline/16GT>



184 Archived version: <https://github.com/aquaskyline/16GT/releases/tag/1.0>

185 Operating system: Platform independent

186 Programming language: C++ and Perl

187 Other requirements: See GitHub page

188 License: GPLv3

189 Any restrictions to use by non-academics: None

190

### 191 ***Authors' contribution***

192 RL, MCS and SLS conceived the study. RL developed and implemented the 16GT algorithm  
193 and benchmarked 16GT with other variant callers. RL, MCS and SLS wrote the paper. All  
194 authors have read and approved the final version of the manuscript.

195

### 196 ***Competing interests***

197 The authors declare that they have no competing interests.

198

## 199 **References**

- 200 1. McKenna A, Hanna M, Banks E, Sivachenko A, Cibulskis K, Kernytsky A, Garimella  
201 K, Altshuler D, Gabriel S, Daly M, DePristo MA: **The Genome Analysis Toolkit: a  
202 MapReduce framework for analyzing next-generation DNA sequencing data.**  
203 *Genome Res* 2010, **20**:1297-1303.
- 204 2. Li H, Handsaker B, Wysoker A, Fennell T, Ruan J, Homer N, Marth G, Abecasis G,  
205 Durbin R, Genome Project Data Processing S: **The Sequence Alignment/Map  
206 format and SAMtools.** *Bioinformatics* 2009, **25**:2078-2079.
- 207 3. Albers CA, Lunter G, MacArthur DG, McVean G, Ouwehand WH, Durbin R: **Dindel:  
208 accurate indel calls from short-read data.** *Genome Res* 2011, **21**:961-973.

1 209 4. Li H: **Improving SNP discovery by base alignment quality.** *Bioinformatics* 2011,  
2  
3 210 **27:1157-1158.**

4  
5 211 5. Luo R, Wong YL, Law WC, Lee LK, Cheung J, Liu CM, Lam TW: **BALSA: integrated**  
6  
7 212 **secondary analysis for whole-genome and whole-exome sequencing,**  
8  
9 213 **accelerated by GPU.** *PeerJ* 2014, **2:e421.**

10  
11 214 6. Garrison E, Marth G: **Haplotype-based variant detection from short-read**  
12  
13 215 **sequencing.** *arXiv preprint arXiv:12073907* 2012.

14  
15 216 7. Li H: **FermitKit: assembly-based variant calling for Illumina resequencing data.**  
16  
17 217 *Bioinformatics* 2015:btv440.

18  
19 218 8. Racz C, Petrovski R, Saunders CT, Chorny I, Kruglyak S, Margulies EH, Chuang H-  
20  
21 219 Y, Källberg M, Kumar SA, Liao A: **Isaac: ultra-fast whole-genome secondary**  
22  
23 220 **analysis on Illumina sequencing platforms.** *Bioinformatics* 2013:btt314.

24  
25 221 9. Zook JM, Chapman B, Wang J, Mittelman D, Hofmann O, Hide W, Salit M: **Integrating**  
26  
27 222 **human sequence data sets provides a resource of benchmark SNP and indel**  
28  
29 223 **genotype calls.** *Nat Biotechnol* 2014, **32:246-251.**

30  
31 224 10. Chiang C, Layer RM, Faust GG, Lindberg MR, Rose DB, Garrison EP, Marth GT,  
32  
33 225 Quinlan AR, Hall IM: **SpeedSeq: ultra-fast personal genome analysis and**  
34  
35 226 **interpretation.** *Nat Methods* 2015, **12:966-968.**  
36  
37 227  
38 228  
39  
40  
41  
42  
43  
44  
45  
46  
47  
48  
49  
50  
51  
52  
53  
54  
55  
56  
57  
58  
59  
60  
61  
62  
63  
64  
65

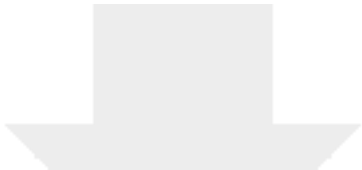

Click here to access/download  
**Supplementary Material**  
Additional File 1.docx



Supplement: gix045_GIGA-D-17-00091_Original-Submission.pdf [file gix045_GIGA-D-17-00091_Original-Submission.pdf]
