# Supplementary material for: 16GT: a fast and sensitive variant caller using a 16-genotype probabilistic model
Source: PubMed Central journal article supplement (PMC5570013; doi:10.1093/gigascience/gix045), 2017-06-15
Supplement: gix045_GIGA-D-17-00091_Revision-1.pdf [file gix045_GIGA-D-17-00091_Revision-1.pdf]

# 16GT: a fast and sensitive variant caller using a 16-genotype probabilistic model

Ruibang Luo<sup>1,2,\*</sup>, Michael C. Schatz<sup>1,2</sup>, Steven L. Salzberg<sup>1,2,3</sup>

<sup>1</sup>Department of Computer Science, Johns Hopkins University

<sup>2</sup>Center for Computational Biology, McKusick-Nathans Institute of Genetic Medicine, Johns Hopkins University School of Medicine

<sup>3</sup>Departments of Biomedical Engineering and Biostatistics, Johns Hopkins University

Email addresses:

Ruibang Luo, [rluo5@jhu.edu](mailto:rluo5@jhu.edu) (ORCID: 0000-0001-9711-6533)

Michael C. Schatz, [mschatz@jhu.edu](mailto:mschatz@jhu.edu) (ORCID: 0000-0002-4118-4446)

Steven L. Salzberg, [salzberg@jhu.edu](mailto:salzberg@jhu.edu) (ORCID: 0000-0002-8859-7432)

\*Corresponding Author

## Abstract

1  
2  
3  
4  
5  
6  
7  
8  
9  
10  
11  
12  
13  
14  
15  
16  
17  
18  
19  
20  
21  
22  
23  
24  
25  
26  
27  
28 16GT is a variant caller for Illumina whole-genome and whole-exome sequencing data. It  
29 uses a new 16-genotype probabilistic model to unify SNP and indel calling in a single variant  
30 calling algorithm. In benchmark comparisons with five other widely used variant callers on a  
31 modern 36-core server, 16GT demonstrated improved sensitivity in calling SNPs, and it  
32 provided comparable sensitivity and accuracy for calling indels as compared to the GATK  
33 HaplotypeCaller. 16GT is available at <https://github.com/aquaskyline/16GT>.

34

## 35 **Keywords**

36 Variant calling; Bayesian model; SNP calling; Indel calling

37

## 38 **Background**

39 Single nucleotide polymorphisms (SNPs) and insertions and deletions (indels) that occur at  
40 a specific genome position are interdependent; i.e., evidence that elevates the probability of  
41 one variant type should decrease the probability of other possible variant types, and the  
42 probability of all possible alleles should sum to 1. However, widely-used tools such as  
43 GATK's UnifiedGenotyper [1] and SAMtools [2] use separate models for SNP and indel  
44 detection. The model for SNP calling in these two tools is nearly identical: both assume all  
45 variants are biallelic (i.e., exactly two haplotypes are present) and use a probabilistic model  
46 allowing for 10 genotypes: AA, AC, AG, AT, CC, CG, CT, GG, GT, TT. For indel calling, the  
47 GATK UnifiedGenotyper uses a model from the Dindel's variant caller [3], while SAMtools'  
48 model is from BAQ [4].

49

## 50 **Findings**

51

52

53

54

55

56

57

58

59

60

61

62

63

64

65

1  
2  
3  
4  
5  
6  
7  
8  
9  
10  
11  
12  
13  
14  
15  
16  
17  
18  
19  
20  
21  
22  
23  
24  
25  
26  
27  
28  
29  
30  
31  
32  
33  
34  
35  
36  
37  
38  
39  
40  
41  
42  
43  
44  
45  
46  
47  
48  
49  
50  
51 In order to detect SNPs and indels with a unified approach, we developed a new 16-  
52 genotype probabilistic model and its implementation named 16GT. Building on an idea first  
53 introduced in Luo et al. [5], 16GT uses an empirically improved model and is the first publicly  
54 available implementation. Using X and Y to denote the indels with the highest (X) and  
55 second highest (Y) support, we add 6 new genotypes (AX, CX, GX, TX, XX and XY) to the  
56 traditional 10-genotype probabilistic model. The six new genotypes include: 1) one  
57 homozygous indel (XX); 2) one reference allele plus one heterozygous indel (AX, CX, GX,  
58 TX); 3) one heterozygous SNP plus one heterozygous indel (AX, CX, GX, TX, reusing the  
59 genotypes in 2); and 4) two heterozygous indels (XY). We exclude the 5 possible  
60 combinations AY, CY, GY, TY, YY because X has higher support than Y. By unifying SNP  
61 and indel calling in a single variant calling algorithm, 16GT not only runs 4 times faster, but  
62 also demonstrates improved sensitivity in calling SNPs and comparable sensitivity in calling  
63 indels to the GATK HaplotypeCaller.

64  
65 Posterior probabilities of these 16 genotypes are calculated using a Bayesian model  
66  $P(L|F) \propto P(F|L)P(L)$ , where  $L$  is an assumed genotype.  $F$  refers to the observation of the 6  
67 alleles (A, C, G, T, X, Y) at a given genome position.  $P(L)$  is the prior probability of the  
68 genotype,  $P(F|L)$  is the likelihood of the observed genotype. and  $P(L|F)$  is the posterior  
69 probability of the genotype. The resulting genotype  $L_{max}$  is assigned to the genotype with the  
70 highest posterior probability. The distance between the highest posterior probability and the  
71 second highest posterior probability is used as a quality metric in 16GT, along with some  
72 other metrics introduced by GATK (GATK , RRID:SCR\_001876) [1].

73

74

75

### 76 ***Calculating the probability of an observation F given the genotype L***

77 To test how well an observation fits the expectation of different genotypes, we use a two-  
78 tailed Fisher's Exact Test  $P$  and use the resulting  $p$ -value as the goodness of fit. When

60  
61  
62  
63  
64  
65

79 calculating the likelihood of a homozygous genotype, ideally we expect 100% single allele  
 80 support from the observation. For example, consider genotype 'AA':

$$81 \quad P(F|AA') = P_{hom}(F_A) \times P_e(F_C, F_G, F_T, F_X, F_Y)$$

82 where  $P_e$  is the probability of an erroneous base call.

83 For a heterozygous genotype, 50% support is expected for each allele in the genotype, for  
 84 example consider 'CG':

$$85 \quad P(F|CG') = P_{het}(F_C, F_G) \times P_e(F_A, F_T, F_X, F_Y)$$

86 where

$$87 \quad P_{hom}(F_A) = P \left( \begin{array}{cc} F_A & F \\ (1 - P_{err})F & F \end{array} \right)$$

$$88 \quad P_{het}(F_C, F_G) = \sqrt{\prod_{i=C,G} P \left( \begin{array}{cc} F_i & F \\ (0.5 - P_{err})F & F \end{array} \right)}$$

$$89 \quad P_e(F_A, F_T, F_X, F_Y) = P \left( \begin{array}{cc} F_A + F_T + F_X + F_Y & F \\ P_{err} \times F & F \end{array} \right)$$

$$90 \quad F_s = \sum_{i=1}^n f(Q_i, M_i, s) \quad s \in \{A, C, G, T, X, Y\}$$

91 where  $s$  is the allele type,  $n$  is the number of reads supporting allele  $s$ ,  $Q_i$  is the base quality,  
 92 and  $M_i$  is the mapping quality.  $f$  is a function describing how  $s$ ,  $Q_i$  and  $M_i$  change the  
 93 observation:

$$94 \quad f(Q_i, M_i, s) = \alpha \times \beta \times \gamma \left\{ \begin{array}{l} \alpha = 0 \text{ if } M_i = 0 \\ \alpha = 1 \text{ if } M_i \neq 0 \\ \beta = 0 \text{ if } Q_i < 10 \\ \beta = 1 \text{ if } 10 \leq Q_i < 13 \\ \beta = 2 \text{ if } 13 \leq Q_i < 17 \\ \beta = 3 \text{ if } 17 \leq Q_i < 20 \\ \beta = 4 \text{ if } Q_i \geq 20 \\ \gamma = 1 \text{ if } s \in \{A, C, G, T\} \\ \gamma = 1.375 \text{ if } s \in \{X, Y\} \end{array} \right.$$

95  
 96 The possible reasons for an observation that does not match the reference genome are: 1) a  
 97 true variant; 2) an error generated in library construction; 3) a base calling error; 4) a  
 98 mapping error; and 5) an error in the reference genome. Reasons 3 and 4 are explicitly

99 captured in our model. For reasons 2 and 5, we include two error probabilities,  $P_s$  for SNP  
 100 error and  $P_d$  for indel error. We define  $P_{err}=P_s+P_d$ , where  $P_s$  and  $P_d$  are set to 0.01 and 0.005,  
 101 respectively. These two values were set empirically based on the observation that SNP  
 102 errors are more common than indel errors in library construction and in the reference  
 103 genome.

104  
 105 In addition, most short read aligners use a dynamic programming algorithm to enable  
 106 gapped alignment, using a scoring scheme that usually penalizes gap opening and  
 107 extension more than mismatch. Consequently, authentic gaps that occur at an end of a read  
 108 are more likely to be substituted by a set of false SNPs or alternatively to get trimmed or  
 109 clipped. Thus, we applied a coefficient  $\gamma$  to weight indel observations more than SNPs, in  
 110 order to increase the sensitivity on indels.

111  
 112 ***Calculating the probability of the genotype L***

113 Given 1) a known rate of single nucleotide differences between two unrelated haplotypes; 2)  
 114 a known rate of single indel differences between two unrelated haplotypes; and 3) a known  
 115 Transitions to Transversions ratio (Ti/Tv), the 16GT model's prior probabilities are calculated  
 116 as shown in **Table 1**.

117  
 118  
 119  
 120  
 121

| <b>Table 1. <math>P(L)</math>, Genotype prior probabilities for a reference allele 'A'.</b><br>Hom.: homozygous. Het.: heterozygous. |        |                |                  |                         |                              |
|--------------------------------------------------------------------------------------------------------------------------------------|--------|----------------|------------------|-------------------------|------------------------------|
| $L$                                                                                                                                  | Zygoty | Number of SNPs | Number of Indels | Number of Transversions | Prior Probability $P(L)$     |
| AA                                                                                                                                   | Hom.   | -              | -                | 0                       | 1                            |
| GG                                                                                                                                   | Hom.   | 1              | 0                | 2                       | $\theta/2*\epsilon*\epsilon$ |

|        |      |   |   |   |                            |
|--------|------|---|---|---|----------------------------|
| CC, TT | Hom. | 1 | 0 | 0 | $\theta/2$                 |
| AG     | Het. | 1 | 0 | 1 | $\theta*\epsilon$          |
| AC, AT | Het. | 1 | 0 | 0 | $\theta$                   |
| CG, GT | Het. | 2 | 0 | 1 | $\theta*\theta/2*\epsilon$ |
| CT     | Het. | 2 | 0 | 0 | $\theta*\theta/2$          |
| AX     | Het. | 0 | 1 | 0 | $\omega$                   |
| GX     | Het. | 1 | 1 | 1 | $\omega*\theta/2*\epsilon$ |
| CX, TX | Het. | 1 | 1 | 0 | $\omega*\theta/2$          |
| XX     | Hom. | 0 | 1 | 0 | $\omega/2$                 |
| XY     | Het. | 0 | 2 | 0 | $\omega*\omega/2$          |

Given 1) a known rate  $\theta$  of single nucleotide differences between two unrelated haplotypes; 2) a known rate  $\omega$  of single indel differences between two unrelated haplotypes; and 3) a known Transitions to Transversions ratio (Ti/Tv)  $\epsilon$ , where transition is expected to occur more frequently than transversion under selective pressure. The default known rates for human genome are:  $\theta = 0.001$ ,  $\omega = 0.0001$ ,  $\epsilon = 2.1$ , where  $\epsilon$  is set to the value for human and needs to be changed for other species.

## Results

We benchmarked 16GT with GATK UnifiedGenotyper, GATK HaplotypeCaller (GATK , RRID:SCR\_001876) [1], Freebayes (FreeBayes, RRID:SCR\_010761) [6], Fermikit [7], ISAAC (Isaac, RRID:SCR\_012772) [8] and VarScan2 [9] using a set of very high-confidence variants developed by the Genome-in-a-bottle (GIAB) project for genome NA12878 (Coriell Cat# GM12878, RRID:CVCL\_7526) [10] (version 2.19, Additional File 1: **Supplementary Note**).

The results are shown in **Table 2** and as ROC curves in **Supplementary Figure 1**.

**Table 2. Benchmark comparisons between 16GT and five other variant callers on a dataset from the Genome in a Bottle project consisting of 787M read pairs (53-fold) from genome NA12878. UG: GATK UnifiedGenotyper; HC: GATK HaplotypeCaller. FP: false positive, FN: false negative.**

| Caller | Time (minutes w/ 36 cores) | SNP |       |           |             |    | Indel |                |       |           |    |
|--------|----------------------------|-----|-------|-----------|-------------|----|-------|----------------|-------|-----------|----|
|        |                            | TP  | FP    |           |             | FN | TP    | FP             |       |           | FN |
|        |                            |     | Total | dbSNP 138 | dbSNP 138 % |    |       | TP in Omni 2.5 | Total | dbSNP 138 |    |
|        |                            |     |       |           |             |    |       |                |       |           |    |

|           |     |           |       |       |     |       |        |         |       |       |     |        |
|-----------|-----|-----------|-------|-------|-----|-------|--------|---------|-------|-------|-----|--------|
| 16GT      | 121 | 2,663,179 | 5,346 | 4,220 | 79% | 20/20 | 918    | 167,549 | 1,462 | 944   | 65% | 3,180  |
| UG        | 29  | 2,655,608 | 1,639 | 563   | 34% | 15/15 | 8,489  | 163,839 | 624   | 546   | 88% | 6,890  |
| HC        | 539 | 2,653,684 | 419   | 143   | 34% | 4/4   | 10,413 | 168,444 | 1,232 | 726   | 59% | 2,285  |
| Freebayes | 52  | 2,655,513 | 724   | 353   | 49% | 11/14 | 8,584  | 162,505 | 559   | 0     | 0%  | 8,224  |
| Fermikit  | 45  | 2,567,672 | 2,036 | 509   | 25% | 9/9   | 96,425 | 161,916 | 1,996 | 1,076 | 54% | 8,813  |
| ISAAC     | 63  | 2,659,438 | 1,115 | 586   | 53% | 15/15 | 4,659  | 158,642 | 1,239 | 710   | 57% | 12,087 |
| VarScan2  | 136 | 2,658,358 | 1,680 | 718   | 43% | 10/10 | 5,739  | 158,906 | 574   | 481   | 84% | 11,823 |

138

139 For SNPs, 16GT produced the most true positive calls and the fewest false negative calls;

140 i.e. it has the highest sensitivity and specificity among all tools. 79% of 16GT's false positive  
141 calls were also reported by dbSNP version 138, which is highest among other callers.

142 However, we should point out that the GIAB variant set is biased towards GATK because it  
143 was primarily derived from GATK-based analyses, as reported previously [11]. As an

144 orthogonal test, we further assessed the false positive calls against a set of unbiased calls  
145 made by the Illumina Omni 2.5 SNP array (Additional File 1: **Supplementary Note**). Among

146 the 5,346 false positive calls for 16GT, 20 were covered by the Omni array and all 20 (100%)  
147 had the correct genotype. Although limited by the small number of measurable alleles in the

148 Illumina Omni 2.5 SNP array, only allowing us to reassess 20 'false positive' calls as true  
149 positives, the observation that all 20 genotypes out of the 20 covered alleles are correct

150 suggests that a number of the remaining "false positive" calls are actually correct.

151

152 For indels, 16GT produced slightly fewer true positive calls and slightly more false negative  
153 calls than HaplotypeCaller, but less than half as many false negative calls as

154 UnifiedGenotyper. 65% of 16GT's false positive indels were covered by dbSNP version 138.

155 Further investigation into the 1,462 false positive indels shows that 981 (67%) of them meet  
156 all three of the following criteria: 1) at least three reads supporting the variant; 2) at least one

157 read supporting both the positive and negative strands, and; 3) in over 80% of the reads that  
158 support the variant, there exists no other variant in its flanking 10bp. This suggests that

159 some of these "false positives" might be correct, although further experimental validation

160 would be required to confirm this suggestion. **Supplementary Figure 2** shows three  
161 examples where the putative false positive from 16GT is likely to be correct.

162

## 163 **Conclusions**

164 16GT is the firstly publicly available implementation using a 16-genotype probabilistic model  
165 for variant calling. Compared with local assembly based variant callers, 16GT provides  
166 better sensitivity in SNP calling and comparable sensitivity in indel calling. In the current  
167 implementation, 16GT can only be applied to germline variant detection. In the future, we will  
168 enhance 16GT to support multi-sample variant calling and GVCF output, to support somatic  
169 variant detection and extend the model to support variant calling in species with more than  
170 two haplotypes.

171

## 172 **Declarations**

### 173 ***Abbreviations***

174 GIAB: Genome-in-a-bottle; indel: insertions and deletions; SNP: single nucleotide  
175 polymorphism; Ti/Tv: Transitions to Transversions

176

### 177 ***Acknowledgements***

178 We thank United Electronics Co. Limited for providing code samples for the bam2snapshot  
179 function.

180

### 181 ***Funding***

182 This work has been supported by the U.S. National Institutes of Health under grants R01-  
183 HL129239 and R01-HG006677.

184



185 **Availability of source code and requirements**

186 Project name: 16GT

187 Project homepage: <https://github.com/aquaskyline/16GT>

188 Archived version: <https://github.com/aquaskyline/16GT/releases/tag/1.0>

189 Operating system: Platform independent

190 Programming language: C++ and Perl

191 Other requirements: See GitHub page

192 License: GPLv3

193 Any restrictions to use by non-academics: None

194

195 **Availability of supporting data and materials**

196 Snapshots of the code and data are available in the *GigaScience* GigaDB repository [12]

197 and are also available via the Code Ocean reproducibility platform [13].

198

199 **Authors' contribution**

200 RL, MCS and SLS conceived the study. RL developed and implemented the 16GT algorithm

201 and benchmarked 16GT with other variant callers. RL, MCS and SLS wrote the paper. All

202 authors have read and approved the final version of the manuscript.

203

204 **Competing interests**

205 The authors declare that they have no competing interests.

206

207

207 **References**

208

208 1. McKenna A, Hanna M, Banks E, Sivachenko A, Cibulskis K, Kernytzsky A, Garimella

209

209 K, Altshuler D, Gabriel S, Daly M, DePristo MA: **The Genome Analysis Toolkit: a**

210

211

212

213

214

215

1 210 **MapReduce framework for analyzing next-generation DNA sequencing data.**  
2  
3 211 *Genome Res* 2010, **20**:1297-1303.  
4  
5 212 2. Li H, Handsaker B, Wysoker A, Fennell T, Ruan J, Homer N, Marth G, Abecasis G,  
6  
7 213 Durbin R, Genome Project Data Processing S: **The Sequence Alignment/Map**  
8  
9 214 **format and SAMtools.** *Bioinformatics* 2009, **25**:2078-2079.  
10  
11 215 3. Albers CA, Lunter G, MacArthur DG, McVean G, Ouwehand WH, Durbin R: **Dindel:**  
12  
13 216 **accurate indel calls from short-read data.** *Genome Res* 2011, **21**:961-973.  
14  
15 217 4. Li H: **Improving SNP discovery by base alignment quality.** *Bioinformatics* 2011,  
16  
17 218 **27**:1157-1158.  
18  
19 219 5. Luo R, Wong YL, Law WC, Lee LK, Cheung J, Liu CM, Lam TW: **BALSA:**  
20  
21 220 **integrated secondary analysis for whole-genome and whole-exome**  
22  
23 221 **sequencing, accelerated by GPU.** *PeerJ* 2014, **2**:e421.  
24  
25 222 6. Garrison E, Marth G: **Haplotype-based variant detection from short-read**  
26  
27 223 **sequencing.** *arXiv preprint arXiv:12073907* 2012.  
28  
29 224 7. Li H: **FermiKit: assembly-based variant calling for Illumina resequencing data.**  
30  
31 225 *Bioinformatics* 2015:btv440.  
32  
33 226 8. Raczky C, Petrovski R, Saunders CT, Chorny I, Kruglyak S, Margulies EH, Chuang H-  
34  
35 227 Y, Källberg M, Kumar SA, Liao A: **Isaac: ultra-fast whole-genome secondary**  
36  
37 228 **analysis on Illumina sequencing platforms.** *Bioinformatics* 2013:btt314.  
38  
39 229 9. Koboldt DC, Zhang Q, Larson DE, Shen D, McLellan MD, Lin L, Miller CA, Mardis  
40  
41 230 ER, Ding L, Wilson RK: **VarScan 2: somatic mutation and copy number**  
42  
43 231 **alteration discovery in cancer by exome sequencing.** *Genome Res* 2012,  
44  
45 232 **22**:568-576.  
46  
47 233 10. Zook JM, Chapman B, Wang J, Mittelman D, Hofmann O, Hide W, Salit M:  
48  
49 234 **Integrating human sequence data sets provides a resource of benchmark SNP**  
50  
51 235 **and indel genotype calls.** *Nat Biotechnol* 2014, **32**:246-251.  
52  
53 236 11. Chiang C, Layer RM, Faust GG, Lindberg MR, Rose DB, Garrison EP, Marth GT,  
54  
55 237 Quinlan AR, Hall IM: **SpeedSeq: ultra-fast personal genome analysis and**  
56  
57 238 **interpretation.** *Nat Methods* 2015, **12**:966-968.  
58  
59  
60  
61  
62  
63  
64  
65

1 239 12. Luo, R; Schatz, M, C; Salzberg, S, L (2017): **Supporting data for "16GT: a fast and**  
2 **sensitive variant caller using a 16-genotype probabilistic model"** GigaScience  
3 240  
4 Database. <http://dx.doi.org/10.5524/100316>  
5 241  
6  
7 242 13. Luo, R (2017): **16GT: a fast and sensitive variant caller using a 16-genotype**  
8 **probabilistic model [Source Code]**. Code Ocean.  
9 243  
10 <http://dx.doi.org/10.24433/CO.0a812d9b-0ff3-4eb7-825f-76d3cd049a43>  
11 244  
12 245  
13 246  
14  
15  
16  
17  
18  
19  
20  
21  
22  
23  
24  
25  
26  
27  
28  
29  
30  
31  
32  
33  
34  
35  
36  
37  
38  
39  
40  
41  
42  
43  
44  
45  
46  
47  
48  
49  
50  
51  
52  
53  
54  
55  
56  
57  
58  
59  
60  
61  
62  
63  
64  
65

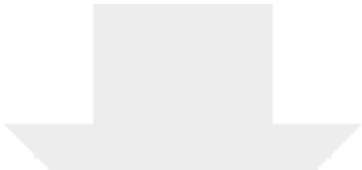

Click here to access/download  
**Supplementary Material**  
Additional File 1-2.docx



**Responses to  
Comments of reviewers**

16GT: a fast and sensitive variant caller using a 16-genotype probabilistic model

Ruibang Luo; Michael C Schatz; Steven L Salzberg

**GIGA-D-17-00091**

We appreciate the constructive comments from the editor and all the reviewers as well as their extra work on the evaluation of 16GT.

**Editor**

-----

Comments:

1. One referee flags the comparisons you make, so please make sure there is sufficient comparisons and citation of the state-of-the-art in this field (e.g. its been highlighted on the pre-print that Scalpel, VarScan2, VarDict, Mutect2 and Strelka have not been included as benchmarks).

*Response:*

*The comparison to VarScan2 has been added to the manuscript. Table 2 now comprises comparisons to six germline variant callers including two state-of-the-art callers named GATK-HC and Freebayes, and four other callers named, GATK-UG, Fermikit, ISAAC and VarScan2. VarDict, Mutect2 and Strelka are somatic variant callers, thus not compared to 16GT. Scalpel is an indel caller that doesn't detect SNPs, thus we did not compare it to 16GT. (Please note that one of us – MCS – is a co-author of Scalpel, so we know it well.)*

**Reviewer: 1**

-----

The authors present a new model that can call both SNPs and INDELS by expanding the number of possible allele states to 16. The paper is well written, the model is an interesting contribution, and the results are compelling. I would like to see a little more detail in a few sections of the paper.

The standard method for communicating the true positive / false negative trade off in variant calling is a ROC-style line plot. The shape of this curve can be insightful for readers who need place their experiments at different points along this plot depending on the particulars of their experiment. Since table 2 only reports a single point on that curve, the readers do not have this context. It is also not clear that these numbers represent comparable points along their curves.

*Response:*

*We have added 7 ROC curves to our analysis, all shown in supplementary figure 1.*

I don't understand why the proportion of false positives in dbSNP v138 is interesting when calling against NA12878 and why having a higher proportion in dnSNP v183 is better. I recognize that these are polymorphic sites, but what about that property is relevant to this analysis?

Response:

For a set of variants that are reported by any variant caller, previous studies show that variants found in dbSNP are much more likely to be true positives, because as you say these sites are known to be polymorphic in the population. Thus for any variant caller, a higher rate of overlap with dbSNP suggests a higher true positive rate. Similarly, if a "false positive" is also reported as a variant in dbSNP, previous studies suggest that it might not be false at all. This is why we mention how many of 16GT's "false" predictions are found in dbSNP - it suggests that some of them are true rather than false.

The idea has been utilized in multiple papers and presentations. Here I list and excerpt from three of them:

1) Screening the human exome: a comparison of whole genome and whole transcriptome sequencing, Cirulli et al., 2010. "SNVs called in the gDNA and cDNA were also compared with entries in dbSNP. It was found that 90% of the gDNA exonic SNVs corresponded to a dbSNP entry, while this was true of only 56% of the cDNA SNVs. However, a further breakdown revealed that 94% of the true positive cDNA SNVs corresponded to a dbSNP entry, while only 23% of the false positives did the same. The false negatives corresponded to dbSNP entries 89% of the time."

Link: <https://dx.doi.org/10.1186%2Fgb-2010-11-5-r57>

2) Sensitive detection of somatic point mutations in impure and heterogeneous cancer samples, Cibulskis et al., 2013. "Figure 3d: Somatic miscall error rate for true germ-line heterozygous single-nucleotide polymorphism sites by sequencing depth in the normal sample when the site is known to be variant in the population (in dbSNP) and previously unknown (not in dbSNP)"

Link: <http://www.nature.com/nbt/journal/v31/n3/full/nbt.2514.html>

3) Improving the Specificity of SNP Calls in the 1000 Genomes Project, Melgar et al., 2009. "Slide 7: SNPs that passed filter have 91% dbSNP. SNPs removed by filter have 33% dbSNP"

Link:

[https://www.broadinstitute.org/files/shared/diversity/summerprogram/2009/mmelgar\\_presentation.pdf](https://www.broadinstitute.org/files/shared/diversity/summerprogram/2009/mmelgar_presentation.pdf)

We agree that the suggestion is relative not absolute. Thus, we highlighted in the manuscript that further experimental validation would be required to confirm this observation.

The model has several "empirically defined" parameters. It would be nice to describe this analysis so that users could modify the parameters for their own experiments. For example, the model will need to be retuned for long reads.

Response:

Empirically defined parameters include  $P_s$ : SNP error rate,  $P_d$ : Indel error rate,  $\vartheta$ : rate of single nucleotide differences between two unrelated haplotypes, and  $\omega$ : rate of single indel differences between two unrelated haplotypes. We found that the appropriate values for these appear to be stable across different species including human, thus we do not suggest that users modify them. For advanced users, we added comments to the code such that users can change the parameters easily. One thing that should change is  $\epsilon$ , which is the transitions to transversions ratio, and we have now highlighted in the manuscript that  $\epsilon$  is preset to the value for human and it needs to be changed for other species.

16GT does not appear to support multi-sample calling. I think the model presented here is good, but unless the software can handle many samples, or at least produce a GVCF, it may see little use.

Response:

We highlighted in the discussion that our next step to extend 16GT's functionality will include 1) supporting multi-sample variant calling and GVCF output, 2) supporting somatic variant detection, and 3)

*extending the model to support variant calling in species with more than two haplotypes*

- Ryan Layer, University of Utah

**Reviewer: 2**

-----

Luo, R. etc described a new 16GT variant caller optimized for Illumina sequencing data that uses a new 16-genotype probabilistic model to unify SNP and indel calling. They demonstrated the improved sensitivity for SNPs and comparable accuracy for indels comparing to GATK HaplotypeCaller, using genome of NA12878 in GIAB project. 16GT more comprehensively models 16 genotypes to unify SNP and indel calling in the same algorithm. 16GT appears to be a useful alternative tool for analyzing germline sequencing using Illumina platform.

A few comments:

1. Need to emphasize that at least at the moment, 16GT can only be applied to germline sequencing using Illumina sequencing platform, and not appropriate for cancer genome sequencing, especially clinical cancer samples, where tumor cellularity varies greatly and not fit those models.

*Response:*

*We now emphasize in the conclusion that, for now, 16GT can only be applied to germline variant detection. In the future, we will improve 16GT to support multi-sample variant calling and GVCF output, to support somatic variant detection and extend the model to support variant calling in species with more than two haplotypes.*

2. Can authors comment on whether increased sensitivity of SNPs is due to incorporation of indels into the model, or are those additional SNPs called have indel as the 2nd allele?

*Response:*

*16GT model performs better than the traditional 10-genotype model at a lower depth and when the authentic variant signals are mingled with noise of the other type. For example, investigation into the 3,710 indels that detected by 16GT but missed in UnifiedGenotyper shows that 95.7% of them are lower than the mean depth and mingled with at least one mismatch. We observed additional SNPs with indels as the 2<sup>nd</sup> allele being called by 16GT than UnifiedGenotyper but not the HaplotypeCaller.*

3. Can authors discuss the limitations of 16GT? What's the indel size limit? Should sex chromosomes be treated differently if gender is known?

*Response:*

*The largest indel 16GT can detect is bounded by the aligner used for input generation. 16GT's algorithm has no limit on indel sizes. The 16GT implementation automatically detects the input gender and treats sex chromosomes differently.*

4. I'm not keen to highlight better indel performance over GATK's UnifiedGenotyper, as it's known to be not a good indel caller, and not widely

used for indels nowadays.

*Response:*

*We agree with the reviewer that UnifiedGenotyper is not widely used for indels after HaplotypeCaller has released. But since 16GT and UnifiedGenotyper are both Bayesian model based, a comparison between 16GT and UnifiedGenotyper can give readers some clues on how the better model improves the performance on indel calling. Note, also this is just one of the many comparisons we have included.*

5. Given the run time in Table 2, I'm not sure "16GT ran faster" should be in the abstract.

*Response:*

*We removed "ran faster" from the abstract.*
